# Supplementary material
Source: HighWire-hosted journal article supplement (https://jnm.snmjournals.org/highwire/filestream/94279/field_highwire_adjunct_files/0/91694_Supplemental_data.pdf)
Supplement: 91694_Supplemental_data.pdf [file 91694_Supplemental_data.pdf]

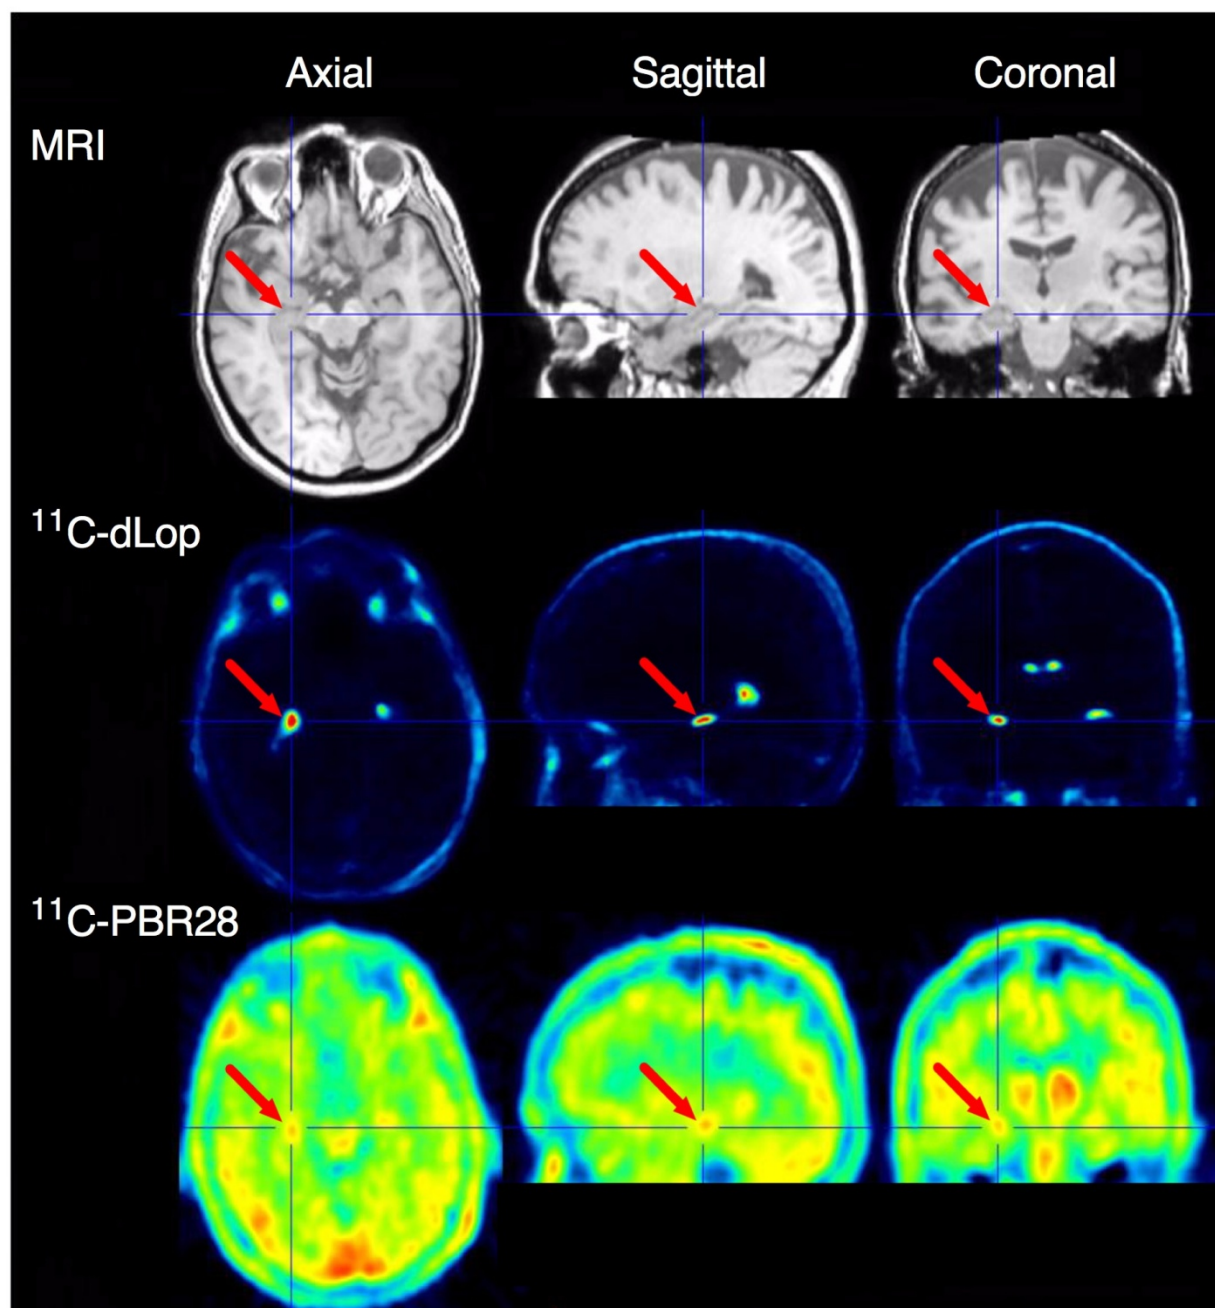

**Supplemental Figure 1.** Axial, sagittal, and coronal sections of MRI,  $^{11}\text{C}$ -dLop, and  $^{11}\text{C}$ -PBR28 from a single healthy subject. Note the spatial correspondence in PET images of the focus of high uptake (arrows), representing uptake in the choroid plexus.
